1 **Mammalian cells internalize bacteriophages and utilize them as a food source to enhance**  
2 **cellular growth and survival**

3

4

5 *Marion C. Bichet*<sup>1,2,3</sup>, *Jack Adderley*<sup>4</sup>, *Laura Avellaneda*<sup>1</sup>, *Linden J. Gearing*<sup>5,6</sup>, *Celine Deffrasnes*<sup>7</sup>,  
6 *Cassandra David*<sup>7</sup>, *Genevieve Pepin*<sup>8</sup>, *Michael P. Gantier*<sup>5,6</sup>, *Ruby CY Lin*<sup>9</sup>, *Ruzeen Patwa*<sup>1</sup>,  
7 *Gregory W. Moseley*<sup>7</sup>, *Christian Doerig*<sup>4</sup> and *Jeremy J. Barr*<sup>1\*</sup>

8

9

10 **Affiliations:**

11 <sup>1</sup> School of Biological Sciences, Monash University, Clayton Campus, VIC, 3800, Australia

12 <sup>2</sup> ACTALIA, Food Safety Department, F-50000 Saint-Lô, France.

13 <sup>3</sup> University of Lorraine, CNRS, LCPME, F-54500 Vandœuvre-lès-Nancy, France.

14 <sup>4</sup> School of Health and Biomedical Science, RMIT University, Bundoora, VIC, 3083, Australia

15 <sup>5</sup> Centre for Innate Immunity and Infectious Diseases, Hudson Institute of Medical Research,  
16 Clayton, VIC, 3168, Australia

17 <sup>6</sup> Department of Molecular and Translational Sciences, Monash University, Clayton, VIC, 3168,  
18 Australia

19 <sup>7</sup> Department of Microbiology, Biomedicine Discovery Institute, Monash University, Clayton, VIC,  
20 Australia

21 <sup>8</sup> Medical Biology Department; Université du Québec à Trois-Rivières, Trois-Rivières (Québec),  
22 Canada, G8Z 4M3

23 <sup>9</sup> Centre for Infectious Diseases and Microbiology; The Westmead Institute for Medical Research,  
24 Westmead NSW 2145, Australia

25

26 **\*Corresponding author & lead contact:**

27 Jeremy J. Barr

28 25 Rainforest Walk, School of Biological Sciences, Monash University, Clayton Campus, VIC,  
29 3800, Australia

30 [jeremy.barr@monash.edu](mailto:jeremy.barr@monash.edu)

31 **ABSTRACT**

32 There is a growing appreciation that the direct interaction between bacteriophages and the  
33 mammalian host can facilitate diverse and unexplored symbioses. Yet the impact these  
34 bacteriophages may have on mammalian cellular and immunological processes is poorly  
35 understood. Here we applied highly purified phage T4, free from bacterial by-products and  
36 endotoxins to mammalian cells and analyzed the cellular responses using luciferase reporter and  
37 antibody microarray assays. Phage preparations were applied *in vitro* to either A549 lung epithelial  
38 cells, MDCK-I kidney cells, or primary mouse bone marrow derived macrophages with the phage-  
39 free supernatant serving as a comparative control. Highly purified T4 phages were rapidly  
40 internalized by mammalian cells and accumulated within macropinosomes but did not activate the  
41 inflammatory DNA response TLR9 or cGAS-STING pathways. Following eight hours of incubation  
42 with T4 phage, whole cell lysates were analyzed via antibody microarray that detected expression  
43 and phosphorylation levels of human signaling proteins. T4 phage internalization led to the  
44 activation of AKT-dependent pathways, resulting in an increase in cell metabolism, survival, and  
45 actin reorganization, the last being critical for macropinocytosis and potentially regulating a positive  
46 feedback loop to drive further phage internalization. T4 phages additionally down-regulated CDK1  
47 and its downstream effectors, leading to an inhibition of cell cycle progression and an increase in  
48 cellular growth through a prolonged G1 phase. These interactions demonstrate that highly purified  
49 T4 phages do not activate DNA-mediated inflammatory pathways but do trigger protein  
50 phosphorylation cascades that promote cellular growth and survival. We conclude that mammalian  
51 cells are internalizing bacteriophages as a food source to promote cellular growth and metabolism.

52  
53

## 54 INTRODUCTION

55 Bacteriophages, also called phages, are viruses that infect and kill bacteria, their natural hosts.  
56 Phages are ubiquitous across environments and are intrinsic components of our microbiomes,  
57 colonizing all niches of the body (1). As such, the human body is frequently and continuously  
58 exposed to a diverse community of phages(2,3). This is especially true within the gut, which houses  
59 a high-diversity microbial community(4). Phages are essential components of the gut and  
60 participate in the genetic diversification and individualization of the gut microbiome throughout our  
61 lifespan (5–10). While phages facilitate many changes to these gut microbial communities, they  
62 are also known to interact with the underlying mammalian cells (1,11–14). Mammalian cells can  
63 engulf phages via a variety of mechanisms, leading to the internalization and accumulation of  
64 active phages (12–15). Phages have been shown to bind specific mammalian cellular receptors,  
65 triggering receptor-mediated endocytosis (16,17). However, this mechanism appears to be quite  
66 rare, as the probability of having matching receptors and ligands between mammalian cells and  
67 phages is low. The predominant mechanism by which phages have been shown to enter  
68 mammalian cells is non-specific internalization via macropinocytosis (1,13,14).

69  
70 Macropinocytosis is an actin-based process that is a unique pathway of endocytosis characterized  
71 by the non-specific internalization of extracellular fluid, nutrients, and potential microorganisms in  
72 large endocytic vesicles (50–1000 nm) known as macropinosomes. Macropinocytosis is essential  
73 for cellular growth and cell proliferation as it allows the cell to gain large amounts of extracellular  
74 nutrients (18–22). Additionally, macropinocytosis can be utilized to sample and subsequently  
75 detect pathogens and foreign nucleic acids, leading to the activation of the innate immune system.  
76 This immune sensing of foreign nucleic acids is a hallmark of antiviral defense; it is a highly  
77 regulated process that involves cellular compartmentalization and the selective recognition of  
78 foreign nucleic acids (23). Macropinocytosis of phages by mammalian cells is a non-specific  
79 process whereby cells create actin-mediated ruffles elongating from the cytosol toward the  
80 environment, which engulf the extracellular milieu and any phages residing within it. Phages  
81 internalized via this pathway steadily accumulate within intracellular macropinosomes (14). The  
82 downstream processing of the macropinosome can follow various pathways, including fusion with  
83 other endocytic vesicles, fusion with lysosomes leading to acidification and the inactivation of  
84 internalized components, recycling and transport to plasma membranes, and constitutive  
85 exocytosis (24).

86  
87 Once inside the cell, phages may stimulate a diverse array of effects. The few studies that have  
88 investigated the cellular and innate immune response to phages have hinted at two opposing  
89 responses. On the one hand, certain phages are known to induce anti-inflammatory effects  
90 (24,25). This has led to suggestions that phages could be used in transplantation patients to reduce  
91 risks of organ rejection (25,26) and may play an immunomodulatory role in the gut microbiome

92 (27,28). On the other hand, a growing number of studies have shown pro-inflammatory immune  
93 responses and inflammation in response to specific phages (29–31). Collectively, these studies  
94 demonstrate that certain phages can induce anti- or pro-inflammatory innate immune responses  
95 and highlight an underlying specificity for the cellular detection of specific viral types. Despite  
96 growing evidence in the field, it remains mechanistically unclear how phages interact with and  
97 modulate the mammalian cells' innate immune response, and how these interactions can influence  
98 downstream cellular processes. Conceptually, the fundamental question as to why mammalian  
99 cells are internalizing phage particles and what selective advantage this pertains, remains open.

100

101 In this study, we investigate whether phage T4 can modulate the cellular and innate immune  
102 pathways across two cell lines *in vitro*. We demonstrate that phages were internalized by  
103 mammalian cells via macropinocytosis, with functional phages continually accumulating within  
104 macropinosomes ((13,14). All phage preparations were highly purified and confirmed to be free of  
105 bacterial endotoxins (32,33). To further ensure the cellular responses detected were elicited by the  
106 phages themselves, we used an additional comparative control that consisted of the highly purified  
107 phage lysate filtered four times through a 0.02  $\mu\text{m}$  filter to remove phage particles and obtain a  
108 phage-free lysate composed of the background supernatant. Using these samples, we then  
109 performed luciferase assays and interrogated antibody microarrays to probe the cellular and innate  
110 immune changes induced by the presence of T4 phages.

111

## 112 **RESULTS**

### 113 **T4 phage does not activate the intracellular DNA-sensing receptors TLR9 and cGAS-** 114 **STING**

115 We focused on bacteriophage T4, a virulent *Tevenvirinae* phage ~200 nm long with a genome of  
116 168,903 bp (34,35) that infects *Escherichia coli*. This phage was selected as it was previously  
117 demonstrated to be internalized by mammalian cells, accumulating intracellularly within  
118 macropinosomes over time (13,14). Phage lysates were purified and concentrated via ultrafiltration  
119 following the Phage on Tap protocol to produce a single, high-titer phage stock that was used for  
120 all subsequent assays (32,33). Phage stocks were treated with DNase and RNase to remove  
121 extracellular nucleic acids followed by endotoxin removal using 1-Octanol washes. As bacterial  
122 endotoxins are known to trigger an innate immune response in TLR4 expressing mammalian cells,  
123 we ensured all phage samples were depleted of endotoxin (<1 EU/mL). Despite this, there  
124 remained the possibility of bacterial components (i.e., proteins, polysaccharides, nucleic acids)  
125 persisting at low levels within our phage lysates. As an additional comparative control, we passed  
126 the phage lysate four times through a 0.02 µm filter to generate a phage-free lysate that would  
127 also contain any residual bacterial components; henceforth referred to as “Filter control”. As the  
128 Filter control contains the same supernatant as the phage lysate but without any phages, it was  
129 used as a comparative control to ensure cellular responses were phage-driven and not induced by  
130 any bacterial residues or buffer contaminants. We also prepared two additional samples, referred  
131 to as “Capsid-only” and “Phage DNA”. The Capsid-only sample was prepared by heating the  
132 phages to break the capsid followed by DNase treatment to eliminate the DNA, and thus contained  
133 only phage proteins. The Phage DNA sample consisted of the extracted T4 phage genome  
134 obtained using the Norgen DNA extraction kit, with DNA integrity checked by T4-specific PCR.

135  
136 We then investigated whether T4 phages and associated controls could be internalized by our *in*  
137 *vitro* tissue culture model, and whether they activate key intracellular nucleic acid receptors, which  
138 stimulate downstream pro-inflammatory immune pathways. T4 phages were applied to both A549  
139 human lung epithelial cells and MDCK-I dog kidney epithelial cell lines and were shown to be  
140 rapidly internalized and sequestered within the macropinosomes (Figure 1A & B) (11,12). Once  
141 internalized, phages and their nucleic acids could be recognized by the nucleic acid receptor TLR9,  
142 a transmembrane protein that resides within endocytic vesicles and preferentially binds DNA from  
143 bacteria and viruses. TLR9 is expressed mainly in immune cells (including leukocytes and  
144 macrophages) but is also known to be expressed in a range of other cell types, including A549  
145 cells (36). For TLR9 to be activated within the macropinosomes, phage DNA would first have to  
146 escape the phage capsid. This could happen through the triggering of the phage ejection apparatus  
147 or phage degradation due to acidic conditions found within the endosome (22). Conversely, if the  
148 phage particles stay intact, then the phage DNA would not be accessible and TLR9 should not be  
149 activated.

150

151 Once activated, TLR9 leads to a downstream cascade via the MyD88 pathway resulting in the  
152 induction of inflammatory cytokines through activation of NF- $\kappa$ B and other transcription factors,  
153 including IRF7, which bind the IFN- $\beta$  promoter (37–40). To test this, we used a luciferase-based  
154 luminescence assay to detect the downstream activation of TLR9 in activating the IFN- $\beta$  promoter  
155 in A549 cells (Figures 2A & B). We used the reporter plasmid pIFN- $\beta$ -GL3Luc, which carries the  
156 promoter region of IFN- $\beta$  gene, and pNF- $\kappa$ B-Luc, which contains five copies of the NF- $\kappa$ B binding  
157 motif of the IFN- $\beta$  promoter, upstream of a luciferase report gene. (41). As positive controls to  
158 activate expression from the plasmids we used FLAG-MAVS and pEF-FLAG-RIGI-I(N), which are  
159 known to activate the IFN- $\beta$  promoter, through activation of NF- $\kappa$ B and parallel pathways. One day  
160 post-transfection of the reporter plasmid carrying the luciferase cassette, either T4 phage at a titer  
161 of  $10^9$  PFU/mL or the Filter control, were added to the transfected cells and incubated for two days.  
162 Cells were then harvested, lysed and luminescence measured. We saw no activation of luciferase  
163 expression from either pNF- $\kappa$ B or pIFN- $\beta$ -GL30Luc in either the Phage or Filter control samples,  
164 while transfection of the positive controls showed strong activation of expression from both  
165 plasmids (Figure 2A & B, Supplemental Figure S1). From these results, we conclude that neither  
166 NF- $\kappa$ B-dependent activation, nor activation by other elements that activate IFN- $\beta$  expression were  
167 induced by the internalization of T4 phages. This suggests that the T4 phage capsid remains intact  
168 and phage DNA is not exposed nor detected by TLR9 within the macropinosome.

169

170 Following internalization and trafficking, phage particles or DNA may escape the macropinosome  
171 and gain access to the cytosol. Here, the presence of free phage DNA would be recognized by the  
172 cGAS-STING pathway, leading to the production of IFN- $\beta$  and inflammatory cytokines (42–45).  
173 For phage-mediated activation of this pathway to occur, phage DNA would have to escape both  
174 the phage capsid and the macropinosomes to access the cytosol. To test this, we incubated wild-  
175 type Bone Marrow-Derived Macrophages (BMDM) or STING knock-out BMDM with either  $10^7$  T4  
176 phages/mL, Filter control, or Capsid-only samples for 18 hours. After incubation, the activation of  
177 the cGAS-STING pathway was measured by ELISA to measure IFN- $\beta$  levels (Figures 2C & D).  
178 Additionally, as a positive control, we transfected cells with extracted T4 phage DNA using  
179 lipofectamine-2000 to demonstrate that phage DNA can activate cGAS-STING. We saw no STING  
180 induction in either the Phages, Filter control or Capsid-only samples, while the positive controls  
181 transfected with phage DNA showed strong activation of STING in the WT cells (Figure 2C).  
182 Comparatively, in the STING-KO BMDM cells, we did not see any activation of the cGAS-STING  
183 pathway for any of the controls or samples (Figure 2D). Importantly, both wild-type and STING-KO  
184 BMDM cells also have a functional TLR9; suggesting that the fact our STING KO cell lines did not  
185 respond to phage stimulation further confirms that TLR9 is indeed not in play. In summary, highly  
186 purified T4 phage were internalized by mammalian cells but did not activate pathways downstream  
187 of TLR9, including NF- $\kappa$ B-dependent pathways, nor cGAS-STING signaling pathways. This

188 suggests that internalized T4 phages capsids remain intact or are trafficked in such a way as to  
189 prevent phage DNA from triggering the innate immune system.

190

### 191 **T4 phage induces protein expression and phosphorylation changes in cell signaling** 192 **pathways**

193 To investigate the broader cellular responses to phage T4, we utilized an antibody microarray to  
194 investigate changes in the expression and phosphorylation of key cell signaling proteins. We used  
195 two protein microarrays from Kinexus Biotech, the KAM-1325 microarray that contains 1,325 pan-  
196 and phosphosite-specific antibodies covering all the main cellular signaling pathways and can  
197 recognise phosphorylated or non-phosphorylated proteins, and the KAM-2000 microarray with  
198 2,000 pan- and phosphosite-specific antibodies. Importantly, the MDCK-I samples were analyzed  
199 by the KAM-1325 antibody array, while the A549 samples were analyzed using the improved KAM-  
200 2000 antibody array, which includes most of the antibodies from the prior array, along with 675  
201 additional antibodies for improved detection of cellular changes. We expanded our initial  
202 characterization of A549 lung epithelial cells and included a second cell line, the MDCK-I dog  
203 kidney epithelial cells, which are known to form strong tight junctions and rapidly internalize and  
204 traffic high numbers of T4 phages (Figure 1B) (13,33). Cells were incubated with either purified T4  
205 phages or the Filter control sample for eight hours, followed by cell lysis, chemical cleavage, and  
206 protein quantification. MDCK-I cell lysates were directly added to the microarray chip before  
207 sending the chip for analysis to Kinexus, whereas the A549 cell lysates were sent to Kinexus where  
208 they were applied to the antibody microarrays followed by analysis.

209

210 For deconvolution of the microarray datasets, we used the previously developed methodology by  
211 Adderley et al. (46). The datasets were mapped onto a network and a pathway analysis, which  
212 utilizes random walks to identify chains of phosphorylation events occurring more or less frequently  
213 than expected (46). Rather than focusing solely on the largest fold changes, this analysis instead  
214 identifies cellular pathway interactions to provide an interpretation of the most important pathways  
215 that are influenced by exposure to phages. Briefly, microarray datasets were filtered to remove low  
216 signal intensity and/or relatively high error signals compared to control signals. The network  
217 analysis was then separately run for both up- and down-regulated phosphorylation events before  
218 being assembled into a comparative pathway map (46). Only pathways with more than two  
219 intermediates and with fold-changes greater than 5% CFC (% changes from control) were selected  
220 for further consideration. This provided us with an overview of the main cellular pathways that were  
221 influenced by the presence of phages (Figure 3: MDCK-I and Figure 4: A549). From this analysis,  
222 we found 52 hits for the MDCK-I cells, and 150 hits for the A549 cells, which utilized the improved  
223 KAM-2000 antibody array. Based on this analysis, we focused our attention on two main pathways  
224 – AKT and the CDK1 – that were common across the two antibody microarray datasets.

225

226 **T4 phage activates the AKT pathway promoting cell growth, survival, and**  
227 **macropinocytosis.**

228 The AKT signaling pathway is a critical signaling pathway that regulates a myriad of cellular  
229 functions, including promoting cell growth, proliferation, survival, and metabolism (47). AKT is a  
230 serine/threonine-specific protein kinase that is activated through extracellular growth factors like  
231 insulin, which are detected through Receptor Tyrosine Kinases (RTK) or G-Protein Coupled  
232 Receptors (GPCR). These receptors recruit PI3K (also called PIK3CA) to the membrane, leading  
233 to the recruitment of PDK1 (also called PDK1), which, once activated, will phosphorylates AKT  
234 on T308. Alternatively, PDK1 may recruit mTORC2 which itself will activate AKT through the S473  
235 phosphorylation site (47,48). Once activated, AKT and its downstream effectors will induce a broad  
236 range of responses, including glycolysis, protein synthesis, cell survival and proliferation, glycogen  
237 synthesis, fatty acid synthesis, and the inhibition of autophagy.

238  
239 In our MDCK-I datasets, we observed the activation of AKT by PDK1 through the S473 and SRC  
240 through the Y326 phosphorylation sites in the presence of T4 phage (Figure 3). Once activated,  
241 AKT led to increased inhibition of BAD (BCL2, which is an agonist of cell death) through the S75  
242 phosphorylation site, preventing apoptosis and enhancing cell survival (48–50). Interestingly, in  
243 our A549 dataset (Figure 4), we observed similar activation of AKT through the S473  
244 phosphorylation site indirectly by PDK1 but also via MAPK14, which is also known as p38 $\alpha$  MAPK.  
245 p38 $\alpha$  MAPK is activated through environmental stresses and proinflammatory cytokines and  
246 usually results in increased cell survival (51). In the A549 cells, the activation of AKT induced the  
247 phosphorylation of EZR (Ezrin) through the T567 phosphorylation site (52,53). Importantly, EZR  
248 acts as an intermediary between the plasma membrane and the actin cytoskeleton of the cell, with  
249 its activation being required for the fusion of cell-to-cell membranes and the formation of  
250 endosomes (54). Macropinocytosis, which is the process T4 phages utilize to access the cell,  
251 requires significant actin reorganization to generate the membrane ruffles and cell-to-cell  
252 membrane fusion to form macropinosomes. As such, the activation of Ezrin through AKT may lead  
253 to a positive feedback loop resulting in enhanced phage uptake through the macropinocytosis  
254 pathway.

255  
256 **T4 phage inhibits the CDK1 pathway to delay cell cycle progression and prolong cellular**  
257 **growth**

258 The activity of cyclin-dependent kinases (CDKs) controls all aspects of cell division. CDK1 is  
259 implicated in many, if not all, cell cycle regulation pathways and is the central hub for regulating  
260 cells progressing through the G2 and mitosis phases of the cell cycle (55–57). CDK1 is essential  
261 and sufficient to drive the mammalian cell cycle, including the entry and exit of mitosis and signaling  
262 the start of the growth proliferation phase (56,58,59).

263



264 In our MDCK-I samples (Figure 3), we observed an in-direct downregulation of CDK1 at the T161  
265 and Y15 phosphorylation sites. The downregulation of CDK1 would inhibit cells from progressing  
266 through the G2 and mitotic phases of the cell cycle. This resulted in cascading down-regulation of  
267 other cell cycle effectors, including JUN, which is a transcription factor implicated in the prevention  
268 of apoptosis and is responsible for the progression of the cell cycle through the G1 phase, via  
269 downregulation at the phosphorylation site S73 (60). With the reduction of JUN's activation, cells'  
270 progression through the G1 phase of the cell cycle would be delayed, keeping cells in a prolonged  
271 state of cellular growth. Simultaneously, we observed the downregulation of the activation of  
272 Ribosomal protein p70S6K (S6 kinase beta-1 also called RPS6KB1), which can regulate both cell  
273 death and proliferation (61). This down-regulation was mediated through two distinct  
274 phosphorylation sites, being the T252 phospho-site, which was acted upon by PI3K and PDK1,  
275 and S447, which was acted upon by CDK1. Once inhibited, the RPS6KB1 mediated inhibition of  
276 IRS-1 (insulin receptor substrate 1) was removed. Previous reports have suggested that IRS-1 can  
277 further activate PI3K, thereby (49) leading to a positive feed-back-loop where IRS-1 activates PI3K  
278 to further increase AKT activation again (47). Interestingly, we also observed the down-regulated  
279 activation of ESR1 (Estrogen Receptor  $\alpha$ ) in both MDCK-I and A549 arrays from the upstream  
280 effectors CDK1 and SRC. ESR1 is a large and complex gene that is regulated by multiple elements  
281 and encodes for the estrogen receptor and transcription factor, both of which are critical for  
282 regulating downstream processes related to cell metabolism, survival, and proliferation (62).  
283 Broadly, phages down-regulated key cell cycle effectors responsible for the progression through  
284 the G1 phase and modulating regulatory elements associated with cell metabolism and survival.

285  
286 In the A549 sample (Figure 4), we observed similar down-regulation of CDK1 as in the MDCK-I  
287 array, but here through the in-direct phosphorylation of Y15 site by both SRC and CHEK1  
288 (Checkpoint Kinase 1). CHEK1 plays an essential role in cell cycle regulation and DNA damage  
289 response (63). CHEK1 further regulates the G1/S transition (along with other cell cycle  
290 checkpoints) and is responsible for preventing cells with DNA damage from progressing through  
291 the cell cycle (64). At the same time, we saw that CHEK1 was down-regulating the phosphorylation  
292 of the tumor suppressor protein TP53 through the S37 phospho-site (65,66). If no damage in the  
293 cell DNA were present, TP53 would be rapidly degraded via the proteasome and no build-up of  
294 the protein would be observed. If DNA damage were observed in the cell, TP53 would be  
295 phosphorylated, and its intracellular concentration would rise, subsequently inducing cell cycle  
296 arrest and apoptosis. Thus, phages were down-regulating CHEK1, which led to a subsequent  
297 decrease in the activation of CDK1, both of which prevent cells from progressing through the G1  
298 phase of the cell cycle, while also depressing TP53 activation, leading to the prevention of cell  
299 cycle arrest and apoptosis.

300

301 **Validation of phage-induced cellular changes**

302 From the microarrays, we observed a common pattern where T4 phages induced cell cycle arrest  
303 at the G1 phase. We experimentally attempted to see if phage application to A549 cells led to  
304 differences in cellular growth and proliferation. Following the application of T4 phage to A549 cells,  
305 we quantified the number of cells every 24 hours for four days and a final time point at seven days  
306 (Figure 5A). We saw no significant differences in cell proliferation between cells incubated with  
307 phages compared to the Filter control. This suggests that the phage-mediated effects on cell cycle  
308 arrest and growth were not sufficient to influence aggregate cellular growth and proliferation in this  
309 assay. Next, we utilized a comprehensive FACS assay that measured the DNA concentration for  
310 each cell to assign them to either a cell cycle phase or cell death. Briefly, A549 cells at 70%  
311 confluency were incubated with either T4 phages or the Filter control for eight or 24 hours before  
312 collecting cells, treatment with propidium iodide, and analysis via FACS (Figure 5B) (67). While we  
313 did not see any significant differences in cell cycle between the phage-treated and Filter control  
314 cells at 8-hour time point, we did observe a significant increase in the proportion of phage treated  
315 cells in the G0/G1 phase of the cell cycle compared with the Filter control at the 24 hour time point  
316 ( $P = 0.0463$ ). This suggests that, in line with our microarray observations, T4 phage application to  
317 A549 cells leads to a prolonged G0/G1 phase that would facilitate broad changes in metabolism,  
318 cellular growth, and cell survival.  
319

## 320 **DISCUSSION**

321 We observed substantial cellular responses following the application of T4 phages to our *in vitro*  
322 cell lines (Figure 6). Importantly, we did not see gene activation from the intracellular DNA-sensing  
323 receptors TLR9 and cGAS-STING, suggesting that internalized phages are tightly trafficked to  
324 prevent the triggering of the innate immune system. From the antibody microarray results, we  
325 observed broad protein phosphorylation responses that revealed common patterns across two cell  
326 lines following T4 phage treatment. This suggests that exogenous T4 phages were sensed by  
327 cellular receptors (RTK and GPCRs) and internalized by non-specific macropinocytosis. Phages  
328 promoted cell survival, proliferation, and metabolism signaling through the activation of the AKT  
329 pathway and its downstream effectors. This is consistent with a re-organization of the actin  
330 cytoskeleton, which is critical for macropinocytosis and suggestive of a positive feedback loop  
331 stimulating further phage uptake. We showed experimentally that phages also prevented cell cycle  
332 progression through the downregulation of CDK1 and its effectors. This impaired progression  
333 through the G1 phase of the cell cycle and instead left cells in a prolonged state of cellular growth.  
334 Overall, these changes suggest that while T4 phages have a benign innate immunological effect  
335 on the cell, they do broadly affect cellular response via protein phosphorylation networks. We  
336 propose that these *in vitro* mammalian cells are internalizing phages as a food source to maximize  
337 their growth and metabolism.

338  
339 To activate key inflammatory DNA-sensing innate immune pathways, phage DNA must be  
340 accessible in either the cytosol or macropinosomes. We observed that this was rarely the case in  
341 mammalian cells treated with T4 phage. Our previous research demonstrated that  
342 macropinosome-internalized phages were maintained and accumulated within the cell over time  
343 (14). A smaller subset of these internalized macropinosome-bound phages was capable of  
344 translocation through the basolateral side of the cell, while others co-localized with lysosomes for  
345 further degradation (13). Here we demonstrate that internalized phages did not activate either the  
346 TLR9 nor the cGAS-STING pathways, both of which detect dsDNA within the macropinosome, and  
347 cytosol respectively, as demonstrated through the lack of downstream activation of NF- $\kappa$ B and  
348 IFN- $\beta$ . This suggests two mechanisms, firstly, that phage uptake and transport by the mammalian  
349 cell are tightly regulated by the cell with free phages unlikely to be exposed in the cell cytoplasm,  
350 and secondly, phages are not actively degraded or triggered within the macropinosomes, and  
351 phage DNA is not exposed to TLR9 receptors (Figure 2). Further experiments are required to  
352 explore if different conditions, such as incubation time, pH, temperature, or inflammation state, as  
353 well as differences between phages applied or cell lines used, affect the transport and degradation  
354 of phages and the subsequent activation of innate immune response and cytokine production (29–  
355 31,68)

356

357 We utilized an antibody microarray and a pathway analysis to identify chains of protein  
358 phosphorylation events and synergistic interaction networks to decipher cellular pathways of  
359 interest (46). From this analysis, we identified two main pathways – AKT and CDK1 – that were  
360 affected by T4 phages across our two *in vitro* cell lines. AKT is at the center of a multitude of  
361 different cellular processes ranging from the cell cycle, apoptosis, cell survival, glucose  
362 metabolism, and the immune system (47,69). The AKT pathway auto-regulates depending on the  
363 environmental stress factors, especially in response to the level of extracellular nutrients available  
364 for the cell. The activation of AKT at phosphorylation site S473 is known to activate the uptake of  
365 glucose for energy production and to promote cellular growth (70), inhibit FoxO proteins to promote  
366 anti-apoptotic and cell survival pathways (71,72), and lead to the downstream activation of the Wnt  
367 pathway that triggers the entry of cells from G0 into G1 phase (73). Similarly, recent work  
368 investigating LNCaP epithelial cells incubated with either T4 phage or M13 filamentous phage  
369 found phages mediated the up regulation of the PI3K/AKT pathway leading induced changes in  
370 integrin expression as well as increased cell survival (74). We further observed that CDK1 was  
371 downregulated by the presence of T4 phages in both cell lines. CDK1 is known to be at the center  
372 of all the control checkpoints for the cell cycle and its activation is required for cells to move  
373 between cell cycle phases (56). The inhibition of CDK1 led to cascading down-regulation of the  
374 cell cycle effector JUN, whose activation is required for the progression of the cell cycle through  
375 the G1 phase (60). Simultaneously, we saw a down-regulation of apoptosis via AKT inhibition of  
376 BAD and the downregulation of the TP53 phosphorylation (57,75,76). Finally, we further observed  
377 AKT activation leading to the up regulation of Ezrin (EZR) at phosphosite T567. The membrane-  
378 cytoskeleton linker Ezrin is mainly expressed in epithelial cells and its activation is required for  
379 macropinocytosis and for the efficient fusion of vesicles with lysosomes (54,77). Mammalian cells  
380 utilized macropinocytosis to take up nutrients in bulk from the extracellular space, with its initiation  
381 stimulated by growth factors and PI3K activation, both of which were activated in our cell lines (78).  
382 These cellular responses suggest that T4 phage application leads to further uptake and  
383 degradation of phages by macropinocytosis, with internalized phages being used as a food source  
384 to promote cellular growth.

385  
386 The most studied group of bacteriophages are the tailed phages (order *Caudoviricetes*) which  
387 consist of a complex proteinaceous capsid that houses a highly compressed nucleic acid genome  
388 (79). From a macromolecular stance, phages are highly condensed packets of nucleotides in an  
389 amino acid shell. Phage T4, which has the most complex capsid structure of any virus, has a  
390 capsid mass of 194 MDa (80), of which 55% comprises DNA with a GC content of 34%, while the  
391 remaining content consisting of capsid proteins containing all essential amino acids (81). Amino  
392 acids are necessary nutrients for the cultivation of mammalian cells *in vitro* with their consumption  
393 rate and metabolic flux impacting the growth, metabolism, and regulation of the cell cycle (82).  
394 Similarly, nucleotides are required for a wide variety of biological processes, growth, and

395 proliferation, and are constantly synthesized *de novo* in all cells. Nucleotide metabolism supports  
396 both RNA synthesis, including ribosomal and messenger RNA to enable biomass production, and  
397 DNA replication to enable cell growth and division (83). However, nucleotide production is energy-  
398 demanding, and in comparison, with other nutrients, endogenous nucleotide production is favored,  
399 as extracellular availability of these nutrients is usually negligible (78). However, the presence of  
400 exogenous phage provides the cells with an abundant source of nucleotides accessible via  
401 macropinocytosis. This increased uptake of phage-derived nucleotides led to the downregulation  
402 of CHEK1 and TP53, both of which are associated with aberrant DNA damage response (64–66).  
403 Phage-derived nucleotides led to the effective arrest of cellular growth by accumulating cells at the  
404 G1/S phase, which caused excessive cellular growth and the inhibition of cell proliferation that  
405 does not affect cell viability (84,85). Our findings support the conclusion that mammalian cells are  
406 internalizing T4 phages, which are composed solely of amino acids and nucleotides, as a food  
407 source to promote cell growth through a prolonged G1 phase.

408  
409 We propose a model whereby phages first contact the mammalian cell membrane through diffusive  
410 mass transfer resulting in direct phage-cell interactions (13,86). This facilitates the non-specific  
411 uptake of cell membrane-associated-phages via macropinocytosis and the accumulation of active  
412 phages within membrane-bound vesicles. Internalized phages steadily accumulate and remain  
413 functional within the cell for hours to days and are trafficked through diverse pathways (13,14).  
414 Phage-containing vesicles are cycled through macropinosomes, fused with lysosomes for  
415 degradation, and exocytosed across the basolateral cell membrane. While internalized T4 phages  
416 do not trigger inflammatory DNA-sensing immune pathways, they do activate expansive protein  
417 phosphorylation cascades. Broadly, these phage-mediated responses may result in increased cell  
418 metabolism, cell survival, and further phage uptake via macropinocytosis, while inhibiting  
419 autophagy and cell cycle progression through the G1 phase, likely due to the increased supply of  
420 phage-derived DNA, leading to increased nucleotide catabolism and a prolonged stage of cellular  
421 growth. Further work is required to determine how broad these phage-mediated cellular effects  
422 might be. This should include expanding cellular and metabolomics assays on diverse cell types,  
423 particularly primary cells, rather than the cancerous cell lines utilized here, which may have a  
424 predisposition for enhanced metabolism and growth. Additional phage types and morphologies  
425 should be investigated to decipher how cellular uptake and recognition can promote both the non-  
426 inflammatory, cellular growth phenotype reported here, versus with the inflammatory phenotype  
427 induced by certain phage species (29–31). Open questions remain as to how and why certain  
428 phage species trigger aberrant cellular responses (31), whether internalized phages can infect  
429 intracellular pathogens (87), how internalized phage particles are degraded and metabolized, and  
430 mechanistically how phage-delivered nucleic acids and proteins are accessed by the cell (17,88).

431  
432

433 **MATERIAL AND METHODS**

434

435 **Bacterial stocks and phage stocks.** The bacterial strain used in this study was *Escherichia coli*  
436 *B* strain HER 1024, which was cultured in lysogeny broth (LB) media (10 g tryptone, 5 g yeast  
437 extract, 10 g NaCl, in 1 liter of distilled water [dH<sub>2</sub>O]) at 37 °C shaking overnight and used to  
438 propagate and titer T4 phages supplemented with 10 mM CaCl<sub>2</sub> and MgSO<sub>4</sub>. T4 phages were  
439 cleaned and purified using the Phage on Tap (PoT) protocol (32) and titered up to a concentration  
440 of approximately 10<sup>11</sup> phages/mL to produce a phage stock solution that was used for all  
441 experiments. After purification, phages were treated with DNase-I and RNase and then stored in  
442 a final solution of SM Buffer (2.0 g MgSO<sub>4</sub>·7H<sub>2</sub>O, 5.8 g NaCl, 50 mL of 1M Tris-HCl pH 7.4,  
443 dissolved in 1 liter of dH<sub>2</sub>O) at 4 °C.

444

445 **Endotoxin removal.** The endotoxin removal protocol followed the Phage on Tap (PoT) protocol  
446 (32). The phages lysate was cleaned four times with 1-Octanol to remove endotoxins from the  
447 lysate, reducing endotoxins from 5734 EU/mL to 167 EU/mL in the final phage stock solution (10<sup>11</sup>  
448 phages/mL) (see also (33)). In all experiments, unless otherwise stated, phages were diluted in  
449 endotoxin-free buffers to a final concentration of 10<sup>8</sup> PFU/mL (unless otherwise stated), resulting  
450 in an endotoxin concentration below 1 EU/mL.

451

452 **Control sample preparation.** Using ultra-pure T4 phage lysates we prepared a new comparative  
453 control sample. First, in the Filter control sample, the lysate was passed four times through a 0.02  
454 µm filter to remove phage particles from the lysate. The absence of phages was confirmed using  
455 a top agar assay at neat dilution with no plaques observed. Second, the capsid-only sample was  
456 obtained by breaking the phage capsid using heat treatment. Phages were heated at around 70  
457 °C to break open the capsid and release DNA. The sample was then treated with DNase-I to  
458 degrade the phage DNA and only the empty capsids remained. Again, the absence of active  
459 phages was tested using plaque assay. Finally, the phage DNA sample was obtained using the  
460 Norgen Phage DNA isolation kit (Norgen Cat#46800) following the manufacturer's instructions and  
461 confirmed using T4 phage-specific PCR.

462

463 **Cell line stocks.** A549 cells were grown in Ham's F-12K (Kaighn's) (also called F12-K) (Life  
464 Technologies Australia Pty. Ltd) media with 10% Fetal Bovine Serum (FBS) (Life Technologies  
465 Australia Pty. Ltd) at 37 °C and 5% CO<sub>2</sub> and supplemented with 1% penicillin-streptomycin (Life  
466 Technologies Australia Pty. Ltd). MDCK-I cells were grown in Modified Eagle Medium (MEM) (Life  
467 Technologies Australia Pty. Ltd) with 10% FBS supplemented with 1% penicillin-streptomycin  
468 (Sigma-Aldrich, Australia) at 37 °C and 5% CO<sub>2</sub>.

469

470 **Confocal microscopy.** For the confocal microscopy experiment, cells were seeded in an IBIDI  $\mu$ -  
471 Slide 8-well glass-bottom slide (DKSH Australia Pty. Ltd). When cells reached 80 to 90%  
472 confluency, cells were incubated for 20 min with the respective culture media for each cell line with  
473 5% Hoechst 33342 stain, excitation/emission 115361/497 nm (Life Technologies Australia Pty.  
474 Ltd) and 1% CellMask deep red plasma membrane stain, excitation/emission 649/666 nm (Life  
475 Technologies Australia Pty. Ltd). After incubation cells were washed three times with Dulbecco's  
476 phosphate-buffered saline (DPBS) and then left in Hank's Balanced Salt Solution (HBSS) with 1%  
477 FBS until acquisition. Purified phages were labelled with 1% SYBR-Gold, excitation/emission  
478 495/537 nm (Life Technologies Australia Pty. Ltd), following the protocol in Bichet et al. 2021b.  
479 200  $\mu$ L of clean stained phages were in each well containing cells, right before the start of the  
480 acquisition (See the detailed protocol in Bichet et al. 2021b). Cells were imaged with HC PL APO  
481 63x/1.40 Oil CS2 oil immersion objective by Leica SP8 confocal microscope on inverted stand with  
482 a hybrid detector (HyD) in real-time. HyD detector was used in sequential mode to detect the  
483 phages. One image was acquired every two minutes for two hours. Time lapses were created  
484 through post-processing using the FIJI software version 2.0.0-rc-68/1.52f (Schindelin et al., 2012).  
485 (See the detailed protocol in Bichet et al. 2021b).

486  
487 **Luciferase assay.** A549 cells were plated at  $1.5 \times 10^5$  cells/mL in 24 well cell culture plates  
488 (Corning) for one day. Once cells reached 70% confluency, the cells were co-transfected using  
489 Fugene HD transfecting reagent at a 1:3 ratio (Promega) along with pRL-TK *Renilla* (*Renilla*  
490 Luciferase, internal control; Promega) as an internal transfection control. We used the reporter  
491 systems pIFN- $\beta$ -GL3-Luc or pNF- $\kappa$ B-Luc for luciferase (Firefly Luciferase) and the positive control  
492 pEF-FLAG-RIGI-I(N) or FLAG-MAVS for IFN- $\beta$  and NF- $\kappa$ B respectively, or the negative control  
493 pUC-18 (empty-vector). A transfection control well was transfected with peGFPC1 instead of pUC-  
494 18 to measure the transfection rate with a fluorescent microscope. Each well was transfected in  
495 duplicate. One day post-transfection phages at  $10^9$  PFU/mL or Filter control were added to the cell  
496 layer for two additional days. Cells were then incubated for 30 min at 4 °C slowing rotating with  
497 Passive Lysis Buffer (Promega Cat#E1941). After incubation with the lysis buffers, cells were  
498 scraped and collected and spun down for 3 min at high speed. The supernatant was collected and  
499 kept at - 20 °C until analysis. The values for firefly luciferase activity were normalized to those of  
500 *Renilla* luciferase by calculating the ration of firefly to *Renilla* luminescence.

501  
502 **BMDMs isolation and differentiation.** BMDMs were obtained by differentiating isolated bone  
503 marrow cells from the femurs of the STING-deficient and matched wild-type control (89). Briefly,  
504 bone marrow cells were flushed, washed, and differentiated in a 20% L929 cell-conditioned  
505 medium for six days at 37 °C in a 5% CO<sub>2</sub>, as described previously (90). The use of mouse tissues  
506 was approved by the Monash University Animal Ethics Committee (MARF/2018/067).

507

508 **cGAS-STING Phage assay.** The day before the phage treatment BDMD cells were detached by  
509 gently scraping the flasks and plated at 100 000 cells per well in a final volume of 200  $\mu$ L in a 96  
510 wells plate. The day after 2  $\mu$ L of  $10^7$  phages/mL solution, Filter control or capsid-only samples (or  
511 1.3 ng of phages DNA complexed with lipofectamine 2000 as control) were added to the BMDM  
512 cells for another 18 hours. Murine IP-10 production was measured from 100  $\mu$ L of the supernatant  
513 from the BMDMs using Mouse CXCL10/IP-10/CRG-2 Duo Set ELISA (R&D systems, #Dy466)  
514 according to the manufacturer's protocol.

515  
516 **KAM-1325 Kinexus antibody microarray.** Following the protocol described in (33), confluent  
517 MDCK-I were incubated with T4 phages or Filter control samples for eight hours at 37 °C and 5%  
518 CO<sub>2</sub>. After incubation, the cells were scraped in lysis buffer before sonication. All samples were  
519 treated as chemically lysed proteins and followed the recommended protocol by Kinexus. The  
520 MDCK-I proteins were quantified using the Bradford protein concentration assay (Thermofisher).  
521 The samples were then incubated on the KAM-1325 array before sending the array to Kinexus for  
522 analysis.

523  
524 **KAM-2000 Kinexus antibody microarray.** Following the protocol described in (33), confluent  
525 A549 cells were incubated with T4 phages or Filter control samples for eight hours at 37 °C and  
526 5% CO<sub>2</sub>. After incubation with the phages or control sample, the cells were scraped in lysis buffer  
527 before sonication. All samples were treated as chemically lysed proteins following the  
528 recommended protocol by Kinexus. The A549 proteins were quantified using the Bradford protein  
529 concentration assay (Thermofisher) and sent to Kinexus to be run on the KAM-2000 array and  
530 analyzed.

531  
532 **Microarray analysis.** The analysis of the microarray dataset was performed using the MAPPINGS  
533 V1.0 network analysis program developed by (46). There was redundancy between the antibodies  
534 tested across the KAM-1325 and -2000 arrays with different antibodies targeting the same protein  
535 for more precision (Supplemental Figures S2 & S3 and Supplemental Tables S1 & S2). First, the  
536 signals were filtered and all signals below 1000 units were considered as low for the KAM-1325  
537 array and below 500 units for the KAM-2000 array and removed from the assay. Any signal with a  
538 high error relative to signal change was disregarded, and any antibody with a higher total signal  
539 error across all the arrays compared to the control arrays was disregarded. Next, each unknown  
540 substrate effect, where no known biological data was found, was considered as an activation effect  
541 for this analysis All nodes (kinases) without a directed edge towards them were the most probable  
542 kinase for the downstream phosphorylation event. This was a consequence of the microarray data  
543 not reporting which kinase is responsible for each phosphorylation event. Independent positive  
544 and negative network analysis were analyzed and in the case of parallel phosphorylation, only the  
545 ones with the greater magnitude values were selected and appeared on the pathway map. To



546 ensure the proper termination of each pathway, three options were chosen: 1- If no other path  
547 were available after the last kinase or substrate, then the pathway was stopped. 2- If the last  
548 phosphorylation had an inhibitory effect then the pathway was stopped as well. 3- Finally, for  
549 pathways with only one downstream option available but with no changes from the data sets  
550 between the cells incubated with the phages and the Filter control, then a percentage of fold  
551 change was assigned for each of these single paths, either between 0-20% for the experimental  
552 data-set and 20% for the control ((46)).

553

554 **Cell cycle assay.** A549 cells were plated in 12 well plates at  $5 \times 10^4$  cells/mL. Six hours after  
555 plating, phages or Filter control samples were added to cells. Using a cell scraper, cells were  
556 collected and counted every 24 hours for four days and then one more time seven days after  
557 plating. Cells were counted using a Malassez counting slide and a light microscope. Each sample  
558 was tested in duplicate and each well was counted twice.

559

560 **FACS assay.** A549 cells were plated at  $8 \times 10^4$  cells/mL. The next day, phages at  $10^9$  PFU/mL or  
561 Filter control samples were added to the cells and incubated for 8 or 24 hours. Cells were then  
562 washed twice with PBS; the washes were collected in a 15 mL falcon tube to prevent the loss of  
563 dead floating cells and a bias in the analysis. We added trypsin to the wells to collect the cells in  
564 the corresponding 15 mL falcon tubes. Cells were quickly centrifuged before adding 1mL of cold  
565 PBS. While vortexing, we slowly added 2.3 mL of ice-cold 100% EtOH. Cells were incubated for  
566 40 min at 4 °C. Cells were centrifuged for 5 min at 300 g and resuspended in 500  $\mu$ L of cold PBS.  
567 Cells were again centrifuged for 5 min at 300 g and resuspended in Cell Cycle Buffer (in PBS add  
568 30  $\mu$ g/mL of PI, 100  $\mu$ g/mL of RNase A), incubating the cells at RT in the dark for 45 min. The cells  
569 were centrifuged for 5 min 300 g and resuspended in 500  $\mu$ L of cold PBS before being transferred  
570 to a 5 mL polystyrene round bottom tube (Corning). Cells were left at 4 °C until FACS analysis  
571 following the (67) protocol. The experiment was performed with triplicate wells for each condition  
572 and a control well with no PI (Supplemental Figures S4 & S5). Data was generated on a 4 laser  
573 Fortessa X-20, manufactured by Becton Dickinson (BD). 100 000 cells were analyzed for each  
574 assay and assigned to a cell cycle stage: G0/G1, G2, S or Sub G0.

575

576 **Statistics.** n represents the number of samples analyzed, each sample was performed in  
577 duplicate. All the statistics across this article were done using the GraphPad Prism software using  
578 One-way ANOVA or two-way ANOVA. The results of the statistics are represented with stars on  
579 top of the corresponding data. All of the microarray experiments were performed with only one  
580 sample, no statistics were applicable to these results.

581

582 **Acknowledgements & funding:**

583 We thank the following labs for kindly providing the cell lines; Hudson Institute of Medical Research  
584 and the Oncogenic Signaling Lab for providing the A549 cell line; Stephane Chappaz for preparing  
585 the mice femurs and extracting the BMDMs. We thank Rongtuan Lin (McGill University, Canada),  
586 Naoto Ito (Gifu University Japan), Natalie Borg (RMIT, Australia) and Takashi Fujita (Kyoto  
587 University, Japan) for kindly providing the INF- $\beta$  GL3 and NF- $\kappa$ B, pEF-FLAG-RIGI-I(N) and FLAG-  
588 MAVS plasmids, respectively. Authors acknowledge and thank the following facilities for kindly  
589 providing equipment and guidance: Monash Micro Imaging Facility for help with microscopy  
590 acquisition, and the FlowCore for assistance with flow cytometry analysis. Marion C. Bichet was  
591 supported by Monash Graduate Scholarship (MGS). This work, including the efforts of Jeremy J.  
592 Barr, was funded by the Australian Research Council DECRA Fellowship (DE170100525),  
593 National Health and Medical Research Council (NHMRC: 1156588 & 1125704), and the Perpetual  
594 Trustees Australia award (2018HIG00007).

595

596 **Authors contributions:**

597 Conceptualization, MCB, JJB; Methodology, MCB, JA, LA, CDe, CDa, GP, RL, RP, GWM, CD,  
598 JJB; Formal Analysis, MCB, JA, LA, LJG, GP; Investigation, MCB; Resources, MPG, GWM, CD,  
599 JJB; Writing – Original Draft Preparation, MCB, JJB; Writing – Review and Editing, all authors  
600 contributed; Supervision and Funding Acquisition, JJB.

601

602 **Declaration of Interest:**

603 JJB has a patent application related to this work (WO2018129536A1).

604

605 REFERENCES

606

- 607 1. Barr JJ. A bacteriophages journey through the human body. *Immunol Rev.*  
608 2017;279(1):106–22.
- 609 2. Merrill CR. Bacteriophage interactions with higher organisms. *Transactions*  
610 *New York Academy of Sciences.* 1974;
- 611 3. Dabrowska K, Switała-Jelen K, Opolski A, Weber-Dabrowska B, Gorski A.  
612 Bacteriophage penetration in vertebrates. *J Appl Microbiol* [Internet]. 2005  
613 [cited 2020 Apr 15];98(1):7–13.
- 614 4. Shkorporov AN, Hill C. Bacteriophages of the Human Gut: The “Known  
615 Unknown” of the Microbiome. Vol. 25, *Cell Host and Microbe.* Elsevier; 2019.  
616 p. 195–209.
- 617 5. Clokie MR, Millard AD, Letarov A V, Heaphy S. Phages in nature.  
618 *Bacteriophage.* 2011 Jan;1(1):31–45.
- 619 6. Sender R, Fuchs S, Milo R, Berg RD, Bianconi E, Piovesan A, et al. Are We  
620 Really Vastly Outnumbered? Revisiting the Ratio of Bacterial to Host Cells in  
621 Humans. *Cell.* 2016 Jan;164(3):337–40.
- 622 7. Stilling RM, Dinan TG, Cryan JF. Microbial genes, brain & behaviour-  
623 epigenetic regulation of the gut-brain axis. *Genes Brain Behav.* 2014;13:69–86.
- 624 8. Shkorporov AN, Clooney AG, Sutton TDS, Ryan FJ, Daly KM, Nolan JA, et al.  
625 The Human Gut Virome Is Highly Diverse, Stable, and Individual Specific. *Cell*  
626 *Host Microbe.* 2019 Oct 9;26(4):527-541.e5.
- 627 9. Shkorporov AN, Stockdale SR, Lavelle A, Kondova I, Heuston C, Upadrasta A,  
628 et al. Viral biogeography of the mammalian gut and parenchymal organs. *Nat*  
629 *Microbiol.* 2022 Aug 1;7(8):1301–11.
- 630 10. Liang G, Zhao C, Zhang H, Mattei L, Sherrill-Mix S, Bittinger K, et al. The  
631 stepwise assembly of the neonatal virome is modulated by breastfeeding.  
632 *Nature.* 2020 May 28;581(7809):470–4.
- 633 11. Huh H, Wong S, St. Jean J, Slavcev R. Bacteriophage interactions with  
634 mammalian tissue: Therapeutic applications. *Adv Drug Deliv Rev.* 2019;145:4–  
635 17.
- 636 12. Dabrowska K, Switała-Jelen K, Opolski A, Weber-Dabrowska B, Gorski A.  
637 Bacteriophage penetration in vertebrates. *J Appl Microbiol.* 2005 Jan;98(1):7–  
638 13.
- 639 13. Nguyen S, Baker K, Padman BS, Patwa R, Dunstan RA, Weston TA, et al.  
640 Bacteriophage transcytosis provides a mechanism to cross epithelial cell layers.  
641 Racaniello VR, editor. *mBio* [Internet]. 2017 Nov 21;8(6):1–14.
- 642 14. Bichet MC, Chin WH, Richards W, Lin YW, Avellaneda-Franco L, Hernandez  
643 CA, et al. Bacteriophage uptake by mammalian cell layers represents a potential  
644 sink that may impact phage therapy. *iScience.* 2021;24(4):102287.
- 645 15. Górski A, Wazna E, Dabrowska BW, Dabrowska K, Switała-Jeleń K,  
646 Miedzybrodzki R. Bacteriophage translocation. *FEMS Immunol Med*  
647 *Microbiol.* 2006 Apr 1;46(3):313–9.
- 648 16. Lehti TA, Pajunen MI, Skog MS, Finne J. Internalization of a polysialic acid-  
649 binding Escherichia coli bacteriophage into eukaryotic neuroblastoma cells. *Nat*  
650 *Commun.* 2017 Dec 4;8(1):1915.
- 651 17. Tao P, Mahalingam M, Marasa BS, Zhang Z, Chopra AK, Rao VB. In vitro and  
652 in vivo delivery of genes and proteins using the bacteriophage T4 DNA  
653 packaging machine. *Proc Natl Acad Sci U S A.* 2013 Apr 9;110(15):5846–51.

- 654 18. King JS, Kay RR. The origins and evolution of macropinocytosis. Vol. 374,  
655 Philosophical Transactions of the Royal Society B: Biological Sciences. Royal  
656 Society Publishing; 2019.
- 657 19. Lim JP, Gleeson PA. Macropinocytosis: an endocytic pathway for internalising  
658 large gulps. *Immunol Cell Biol.* 2011;89:836–43.
- 659 20. Kerr MC, Teasdale RD. Defining Macropinocytosis. *Traffic.* 2009  
660 Apr;10(4):364–71.
- 661 21. Falcone S, Cocucci E, Podini P, Kirchhausen T, Clementi E, Meldolesi J.  
662 Macropinocytosis: Regulated coordination of endocytic and exocytic membrane  
663 traffic events. *J Cell Sci.* 2006 Nov;119(22):4758–69.
- 664 22. Buckley CM, King JS. Drinking problems: mechanisms of macropinosome  
665 formation and maturation. *FEBS J.* 2017;284:3778–90.
- 666 23. Schlee M, Hartmann G. Discriminating self from non-self in nucleic acid  
667 sensing. *Nature.* 2016 [cited 2021 Oct 24];16.
- 668 24. Van Belleghem JD, Dabrowska K, Vanechoutte M, Barr JJ. Phage interaction  
669 with the mammalian immune system. In: *Phage Therapy: A Practical Approach.*  
670 Springer International Publishing; 2019. p. 91–122.
- 671 25. Górski A, Kniotek M, Perkowska-Ptasińska A, Mróz A, Przerwa A, Gorczyca  
672 W, et al. Bacteriophages and Transplantation Tolerance. *Transplant Proc.* 2006  
673 Jan;38(1):331–3.
- 674 26. Gorski A, Dabrowska K, Switala-Jeleń K, Nowaczyk M, Weber-Dabrowska B,  
675 Boratynski J, et al. New insights into the possible role of bacteriophages in host  
676 defense and disease. *Med Immunol.* 2003 Feb;2(1):2.
- 677 27. Focà A, Liberto MC, Quirino A, Marascio N, Zicca E, Pavia G. Gut  
678 inflammation and immunity: What is the role of the human gut virome?  
679 *Mediators Inflamm.* 2015;2015.
- 680 28. Duerkop BA, Hooper L V. Resident viruses and their interactions with the  
681 immune system. *Nat Immunol.* 2013 Jul;14(7):654–9.
- 682 29. Gogokhia L, Buhrke K, Bell R, Hoffman B, Brown DG, Hanke-Gogokhia C, et  
683 al. Expansion of Bacteriophages Is Linked to Aggravated Intestinal  
684 Inflammation and Colitis. *Cell Host Microbe.* 2019 Feb 13 [cited 2020 Sep  
685 29];25(2):285-299.e8.
- 686 30. Sweere JM, van Belleghem JD, Ishak H, Bach MS, Popescu M, Sunkari V, et al.  
687 Bacteriophage trigger antiviral immunity and prevent clearance of bacterial  
688 infection. *Science (1979).* 2019 Mar 29 cited 2020 Apr 20];363(6434).
- 689 31. Adiliaghdam F, Amatullah H, Digumarthi S, Saunders TL, Rahman RU, Wong  
690 LP, et al. Human enteric viruses autonomously shape inflammatory bowel  
691 disease phenotype through divergent innate immunomodulation. *Sci Immunol.*  
692 2022 Apr 1;7(70).
- 693 32. Bonilla N, Rojas MIMI, Cruz GNF, Hung SHSH, Rohwer F, Barr JJ. Phage on  
694 tap—a quick and efficient protocol for the preparation of bacteriophage  
695 laboratory stocks. *PeerJ.* 2016 Jul 26;2016(7):e2261.
- 696 33. Bichet MC, Patwa R, Barr JJ. Protocols for studying bacteriophage interactions  
697 with in vitro epithelial cell layers. *STAR Protoc.* 2021 Sep 17;2(3):100697.
- 698 34. Miller ES, Kutter E, Mosig G, Arisaka F, Kunisawa T, Rügner W. Bacteriophage  
699 T4 genome. *Microbiology and molecular biology reviews.* 2003 Mar;67(1):86–  
700 156, table of contents.
- 701 35. Subedi D, Barr JJ. Temporal Stability and Genetic Diversity of 48-Year-Old T-  
702 Series Phages. *mSystems.* 2021 Feb 23;6(1).

- 703 36. Droemann D, Albrecht D, Gerdes J, Ulmer AJ, Branscheid D, Vollmer E, et al.  
704 Human lung cancer cells express functionally active Toll-like receptor 9. *Respir*  
705 *Res.* 2005 Jan;6(1):1–10.
- 706 37. Wagner H. The immunobiology of the TLR9 subfamily. *Trends Immunol.*  
707 2004;25(7).
- 708 38. Marongiu L, Gornati L, Artuso I, Zanoni I, Granucci F. Below the surface: The  
709 inner lives of TLR4 and TLR9. *J Leukoc Biol.* 2019;(106):140–60.
- 710 39. Huang X, Yang Y. Targeting the TLR9MyD88 pathway in the regulation of  
711 adaptive immune responses. Vol. 14, *Expert Opinion on Therapeutic Targets.*  
712 Taylor & Francis; 2010. p. 787–96.
- 713 40. Kumagai Y, Takeuchi O, Akira S. TLR9 as a key receptor for the recognition of  
714 DNA. Vol. 60, *Advanced Drug Delivery Reviews.* Elsevier; 2008. p. 795–804.
- 715 41. Lin R, Génin P, Mamane Y, Hiscott J. Selective DNA Binding and Association  
716 with the CREB Binding Protein Coactivator Contribute to Differential  
717 Activation of Alpha/Beta Interferon Genes by Interferon Regulatory Factors 3  
718 and 7. *Mol Cell Biol.* 2000 Sep;20(17):6342–53.
- 719 42. Chen Q, Sun L, Chen ZJ. Regulation and function of the cGAS-STING pathway  
720 of cytosolic DNA sensing. *Nat Immunol.* 2016;17(10):1142–9.
- 721 43. Tan X, Sun L, Chen J, Chen ZJ. Detection of Microbial Infections Through  
722 Innate Immune Sensing of Nucleic Acids. *Annu Rev Microbiol.* 2018 Sep  
723 8;72(1):447–78.
- 724 44. Motwani M, Pesiridis S, Fitzgerald KA. DNA sensing by the cGAS–STING  
725 pathway in health and disease. *Nat Rev Genet.* 2019;20.
- 726 45. Kwon J, Bakhoun SF, Kettering S. The Cytosolic DNA-Sensing cGAS-STING  
727 Pathway in Cancer. *aacrjournals.org Cancer Discov.* 2020;10:26–39.
- 728 46. Adderley J, O’donoghue F, Davis S, Doerig C. MAPPINGS v1.0, a tool for  
729 network analysis of large phospho-signalling datasets: application to host  
730 erythrocyte response to Plasmodium infection. *Res Sq.* 2021 Sep 13 [cited 2021  
731 Oct 26];
- 732 47. Manning BD, Cantley LC. AKT/PKB Signaling: Navigating Downstream. *Cell.*  
733 2007 Jun 29;129(7):1261–74.
- 734 48. Cantley LC. The Phosphoinositide 3-Kinase Pathway. *Science (1979).* 2002  
735 May 31 [cited 2021 Aug 27];296(5573):1655–7.
- 736 49. Del Peso L, González-García M, Page C, Herrera R, Nuñez G. Interleukin-3-  
737 Induced Phosphorylation of BAD Through the Protein Kinase Akt. *Genome*  
738 *Issue.* 1997;278(5338):687–9.
- 739 50. Datta SR, Dudek H, Tao X, Masters S, Fu H, Gotoh Y, et al. Akt  
740 Phosphorylation of BAD Couples Survival Signals to the Cell-Intrinsic Death  
741 Machinery. *Cell.* 1997;91:231–41.
- 742 51. Cuadrado A, Nebreda AR. Mechanisms and functions of p38 MAPK signalling.  
743 Vol. 429, *Biochemical Journal.* Portland Press; 2010. p. 403–17.
- 744 52. Quan C, Sun J, Lin Z, Jin T, Dong B, Meng Z, et al. Ezrin promotes pancreatic  
745 cancer cell proliferation and invasion through activating the Akt/mTOR  
746 pathway and inducing YAP translocation. *Cancer Manag Res.* 2019;11:6553–  
747 66.
- 748 53. Song Y, Ma X, Zhang M, Wang M, Wang G, Ye Y, et al. Ezrin Mediates  
749 Invasion and Metastasis in Tumorigenesis: A Review. *Front Cell Dev Biol.*  
750 2020;8(November):1–12.

- 751 54. Marion S, Hoffmann E, Holzer D, le Clainche C, Martin M, Sachse M, et al.  
752 Ezrin Promotes Actin Assembly at the Phagosome Membrane and Regulates  
753 Phago-Lysosomal Fusion. *Traffic*. 2011 Apr;12(4):421–37.
- 754 55. Squire CJ, Dickson JM, Ivanovic I, Baker EN. Structure and Inhibition of the  
755 Human Cell Cycle Checkpoint Kinase, Wee1A Kinase: An Atypical Tyrosine  
756 Kinase with a Key Role in CDK1 Regulation. *Structure*. 2005 Apr;13(4):541–  
757 50.
- 758 56. Santamaría D, Barrière C, Cerqueira A, Hunt S, Tardy C, Newton K, et al. Cdk1  
759 is sufficient to drive the mammalian cell cycle. *Nature*. 2007;448.
- 760 57. Potapova TA, Daum JR, Byrd KS, Gorbsky GJ. Fine Tuning the Cell Cycle:  
761 Activation of the Cdk1 Inhibitory Phosphorylation Pathway during Mitotic Exit.  
762 *Mol Biol Cell*. 2009;20:1737–48.
- 763 58. Doree M. Control of M-phase by maturation-promoting factor. *Curr Opin Cell  
764 Biol*. 1990;2:269–73.
- 765 59. Hunt T. Maturation promoting factor, cyclin and the control of M-phase. *Curr  
766 Opin Cell Biol*. 1989;1:268–74.
- 767 60. Pawlonka J, Rak B, Ambroziak U. The regulation of cyclin D promoters –  
768 review. *Cancer Treat Res Commun*. 2021 Jan;27:100338.
- 769 61. Sridharan S, Basu A. Molecular Sciences Distinct Roles of mTOR Targets  
770 S6K1 and S6K2 in Breast Cancer. *Int J Mol Sci*. 2020;21(1199).
- 771 62. Lung DK, Reese RM, Alarid ET. Intrinsic and Extrinsic Factors Governing the  
772 Transcriptional Regulation of ESR1. Vol. 11, *Hormones and Cancer*. Springer;  
773 2020. p. 129–47.
- 774 63. Patil M, Pabla N, Dong Z. Checkpoint kinase 1 in DNA damage response and  
775 cell cycle regulation. Vol. 70, *Cellular and Molecular Life Sciences*. 2013. p.  
776 4009–21.
- 777 64. Sanchez Y, Wong C, Thoma RS, Richman R, Wu Z, Piwnicka-Worms H, et al.  
778 Conservation of the Chk1 Checkpoint Pathway in Mammals: Linkage of DNA  
779 Damage to Cdk Regulation Through Cdc25. *Science* (1979).  
780 1997;277(5331):1497–501.
- 781 65. Brooks CL, Gu W. Ubiquitination, phosphorylation and acetylation: the  
782 molecular basis for p53 regulation. *Curr Opin Cell Biol*. 2003;15:164–71.
- 783 66. Kruse JP, Gu W. Modes of p53 Regulation. *Cell*. 2009;137(15).
- 784 67. Crowley LC, Chojnowski G, Waterhouse NJ. Measuring the DNA Content of  
785 Cells in Apoptosis and at Different Cell-Cycle Stages by Propidium Iodide  
786 Staining and Flow Cytometry. *Cold Spring Harb Protoc*. 2016 Oct;
- 787 68. van Belleghem JD, Clement F, Merabishvili M, Lavigne R, Vaneechoutte M.  
788 Pro- and anti-inflammatory responses of peripheral blood mononuclear cells  
789 induced by *Staphylococcus aureus* and *Pseudomonas aeruginosa* phages. *Sci  
790 Rep*. 2017 Dec 1;7(1).
- 791 69. Yang WL, Wu CY, Wu J, Lin HK. Regulation of Akt signaling activation by  
792 ubiquitination. *Cell Cycle*. 2010;9(3).
- 793 70. Kumar A, Lawrence JC, Jung DY, Ko HJ, Keller SR, Kim JK, et al. Fat cell-  
794 specific ablation of rictor in mice impairs insulin-regulated fat cell and whole-  
795 body glucose and lipid metabolism. *Diabetes*. 2010 Jun;59(6):1397–406.
- 796 71. Young ARJ, Narita M, Ferreira M, Kirschner K, Sadaie M, Darot JFJ, et al.  
797 Autophagy mediates the mitotic senescence transition. *Genes Dev*. 2009 Apr  
798 1;23(7):798–803.

- 799 72. Guan H, Song L, Cai J, Huang Y, Wu J, Yuan J, et al. Sphingosine kinase 1  
800 regulates the Akt/FOXO3a/Bim pathway and contributes to apoptosis resistance  
801 in glioma cells. *PLoS One*. 2011;6(5).
- 802 73. Vadlakonda L, Pasupuleti M, Pallu R. Role of PI3K-AKT-mTOR and Wnt  
803 signaling pathways in transition of G1-S phase of cell cycle in cancer cells.  
804 *Front Oncol*. 2013;3 APR.
- 805 74. Sanmukh SG, Santos NJ, Barquilha CN, Cuciello MS, Carvalho M de, Reis PP  
806 dos, et al. Bacteriophages M13 and T4 Increase the Expression of Anchorage-  
807 Dependent Survival Pathway Genes and Down Regulate Androgen Receptor  
808 Expression in LNCaP Prostate Cell Line. *Viruses*. 2021;13(1754).
- 809 75. Ayeni JO, Campbell SD. “Ready, Set, Go”: Checkpoint regulation by Cdk1  
810 inhibitory phosphorylation. *Fly (Austin)*. 2014;
- 811 76. Santamaría D, Barrière C, Cerqueira A, Hunt S, Tardy C, Newton K, et al. Cdk1  
812 is sufficient to drive the mammalian cell cycle. *Nature*. 2007;448.
- 813 77. Angelo RD’, Aresta S, Blangy A, Del L, Louvard D, Arpin M. Interaction of  
814 Ezrin with the Novel Guanine Nucleotide Exchange Factor PLEKHG6  
815 Promotes RhoG-dependent Apical Cytoskeleton Rearrangements in Epithelial  
816 Cells. *Mol Biol Cell*. 2007;18:4780–93.
- 817 78. Zhu J, Thompson CB. Metabolic regulation of cell growth and proliferation.  
818 Vol. 20, *Nature Reviews Molecular Cell Biology*. Nature Publishing Group;  
819 2019. p. 436–50.
- 820 79. Yap ML, Rossmann MG. Structure and function of bacteriophage T4. Vol. 9,  
821 *Future Microbiology*. Future Medicine Ltd.; 2014. p. 1319–37.
- 822 80. Fokine A, Chipman PR, Leiman PG, Mesyanzhinov V v, Rao VB, Rossmann  
823 MG. Molecular architecture of the prolate head of bacteriophage T4 [Internet].  
824 2004. Available from: [www.pnas.org/cgi/doi/10.1073/pnas.0400444101](http://www.pnas.org/cgi/doi/10.1073/pnas.0400444101)
- 825 81. Bancbofrt FC, Freifelder D. Molecular Weights of Coliphages and Coliphage  
826 DNA I. Measurement of the Molecular Weight of Bacteriophage T7 by High-  
827 speed Equilibrium Centrifugation. Vol. 54, *J. Mol. Biol*. 1970.
- 828 82. Salazar A, Keusgen M, von Hagen J. Amino acids in the cultivation of  
829 mammalian cells. Vol. 48, *Amino Acids*. Springer-Verlag Wien; 2016. p. 1161–  
830 71.
- 831 83. Lane AN, Fan TWM. Regulation of mammalian nucleotide metabolism and  
832 biosynthesis. Vol. 43, *Nucleic Acids Research*. Oxford University Press; 2015.  
833 p. 2466–85.
- 834 84. Carvalhal A v., Sá Santos S, Calado J, Haury M, Carrondo MJT. Cell growth  
835 arrest by nucleotides, nucleosides and bases as a tool for improved production  
836 of recombinant proteins. In: *Biotechnology Progress*. 2008. p. 69–83.
- 837 85. Diehl FF, Miettinen TP, Elbashir R, Nabel CS, Darnell AM, Do BT, et al.  
838 Nucleotide imbalance decouples cell growth from cell proliferation. *Nat Cell*  
839 *Biol*. 2022 Aug 1;24(8):1252–64.
- 840 86. Barr JJ, Auro R, Furlan M, Whiteson KL, Erb ML, Pogliano J, et al.  
841 Bacteriophage adhering to mucus provide a non-host-derived immunity.  
842 *Proceedings of the National Academy of Sciences*. 2013;110(26):10771–6.
- 843 87. Møller-Olsen C, Ross T, Leppard KN, Foisor V, Smith C, Grammatopoulos  
844 DK, et al. Bacteriophage K1F targets *Escherichia coli* K1 in cerebral endothelial  
845 cells and influences the barrier function. *Sci Rep*. 2020 Dec 1;10(1).
- 846 88. Geier MR, Trigg ME, Merrill CR. Fate of bacteriophage lambda in Non-immune  
847 germ-free mice. *Nature*. 1973;246(5430):221–3.

- 848  
849  
850  
851  
852  
853  
854  
855
89. Jin L, Hill KK, Filak H, Mogan J, Knowles H, Zhang B, et al. MPYS Is Required for IFN Response Factor 3 Activation and Type I IFN Production in the Response of Cultured Phagocytes to Bacterial Second Messengers Cyclic-di-AMP and Cyclic-di-GMP. *The Journal of Immunology*. 2011;187(5):2595–601.
  90. Ferrand J, Gantier MP. Assessing the Inhibitory Activity of Oligonucleotides on TLR7 Sensing. *Methods in Molecular Biology*. 2016 Jan;1390:79–90.



## FIGURES

### A

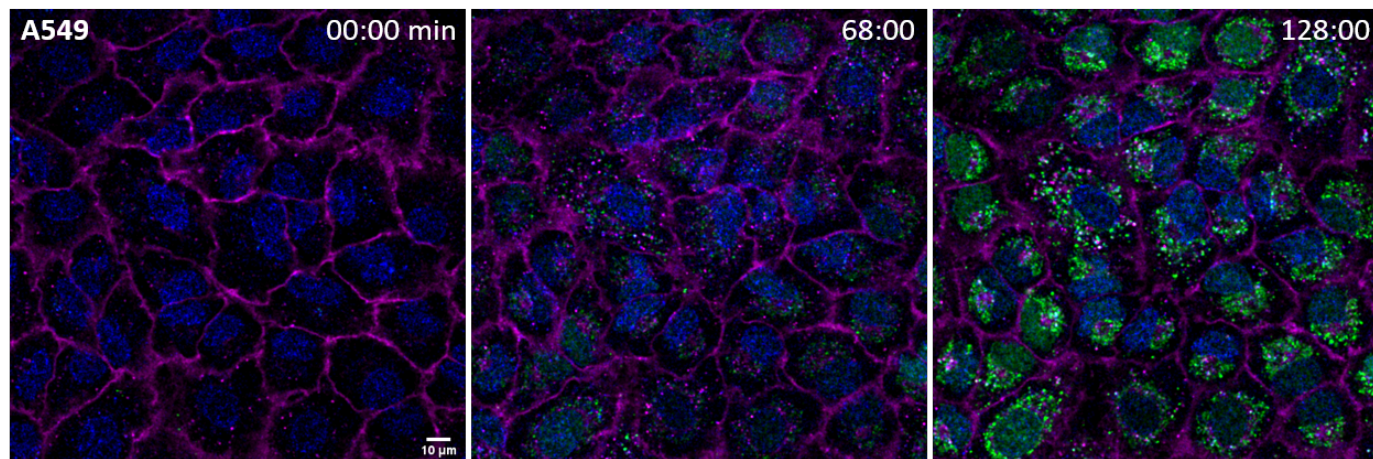

### B

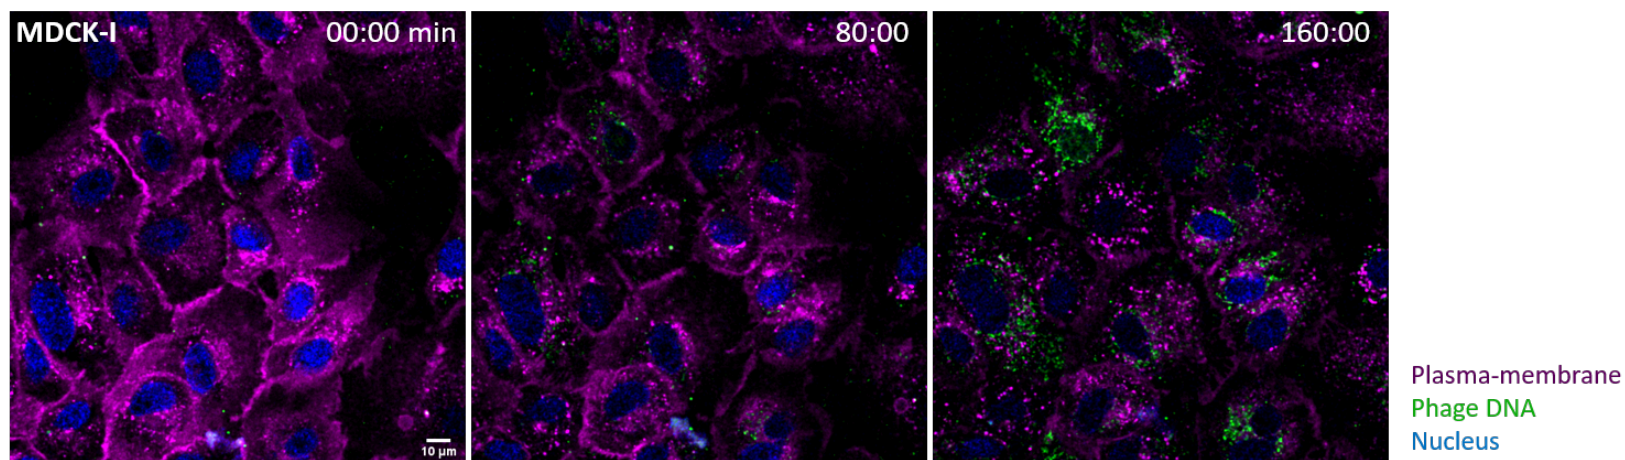

**Figure 1: Microscopy images of T4 phage uptake by mammalian cells. (A)** A549 cells and **(B)** MDCK-I cells incubated with T4 phages for 3h. Images were taken with a confocal microscope every two minutes for three hours. The plasma membrane is shown in magenta, T4 phage DNA in green and the cell nucleus in blue.

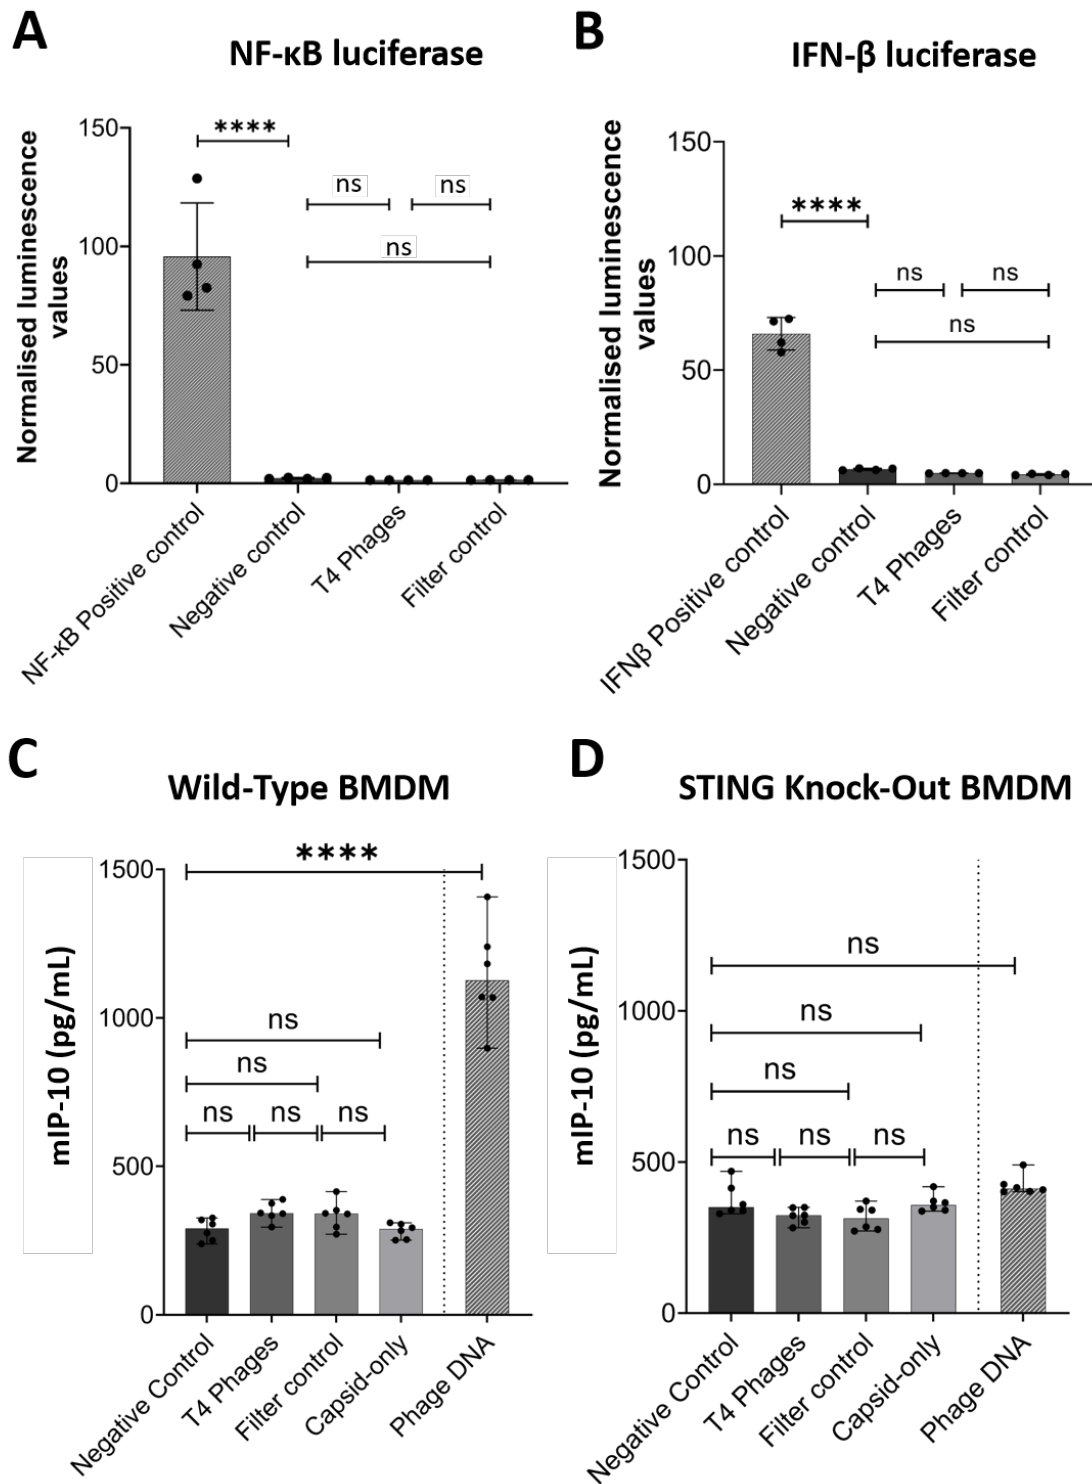

**Figure 2: T4 phage do not trigger a pro-inflammatory immune response.** A549 cells transfected with either NF- $\kappa$ B-dependent luciferase reporter plasmid (A) or IFN- $\beta$  promoter-dependent luciferase reporter plasmid (B) followed by 48 hours incubation with  $10^9$  T4 phages/mL or a Filter control. Differentiated WT (C) or STING KO (D) BMDM cells were incubated for 18 hours  $10^7$  T4 phages/mL, Filter control, Capsid-only or transfected with phage DNA using Lipofectamine 2000. P values between the different groups calculated from a one-way ANOVA, shown as stars ( $P < 0.0001 = ****$ ; A: F (3, 12) = 31.06; B: F (3, 12) = 2.812; C: F (4, 25) = 5.7; D: F (4, 25) = 0.8181).

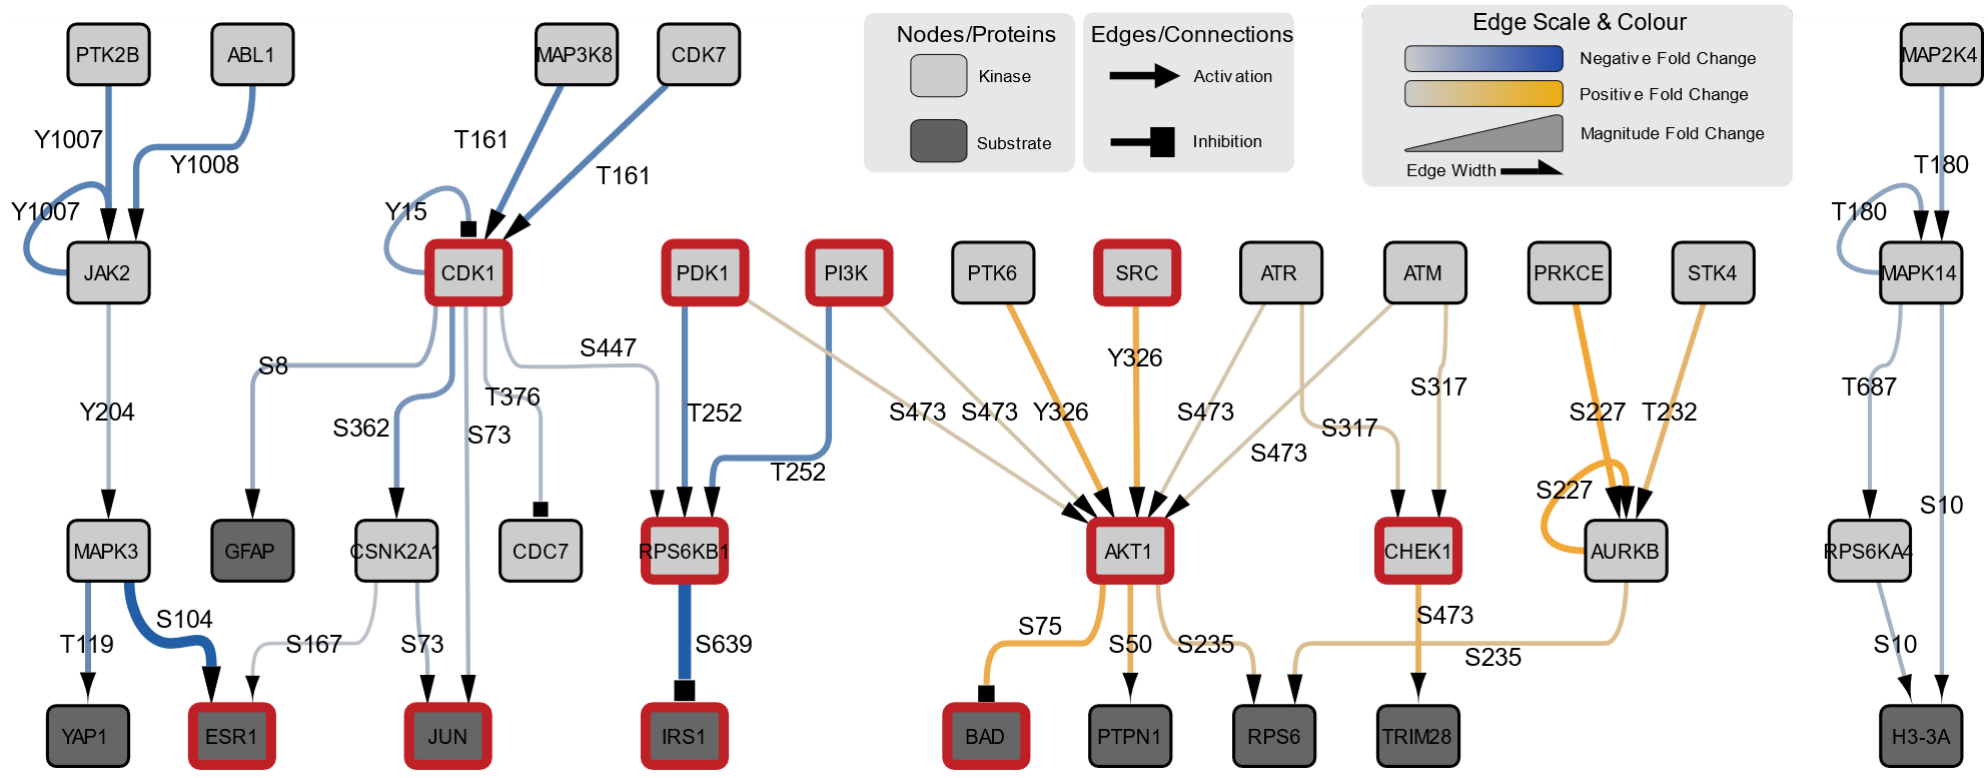

**Figure 3: Network protein analysis on MDCK-I cells treated with T4 phages after eight hours of incubation.** Kinexus protein microarray with MDCK-I cells after eight hours of incubation with T4 phages. Pathway chart with a detailed pathway of the main leads from the assay. Boxes highlighted in red are proteins discussed in this manuscript.



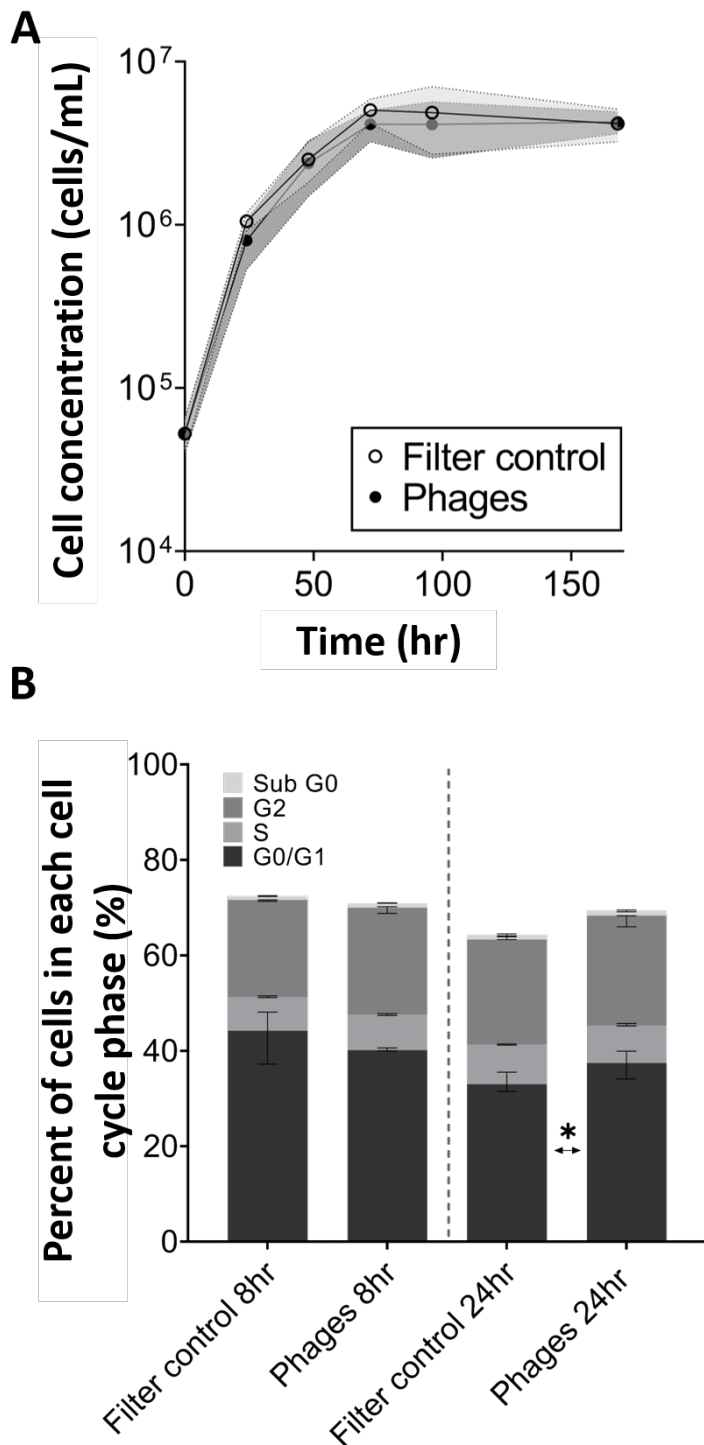

|        | Filter control 8hr | Phages 8hr | Filter control 24hr | Phages 24hr |
|--------|--------------------|------------|---------------------|-------------|
| Sub G0 | 1%                 | 1%         | 1%                  | 1%          |
| G2     | 20%                | 22%        | 22%                 | 22%         |
| S      | 7%                 | 7%         | 8%                  | 8%          |
| G0/G1  | 43%                | 40%        | 33%                 | 37%         |

**Figure 5: Cell proliferation.** (A) The proliferation of A549 cells over time with phages in dark circles and the filter control sample in empty circles (shaded area representing 95% CI). (B) Cell cycle stage repartition within the A549 cell population after 8 or 24 hr incubation with phages or Filter control (error bars representing 95% CI), including a table presenting the percentage of cells in each cell cycle stage of 3 independent replicates of FACS assay each with 100000 cells analysed. P values of each cell cycle stage between the control and the assay were calculated using a two-way ANOVA, shown as stars (C: F (3, 32) = 2.237).

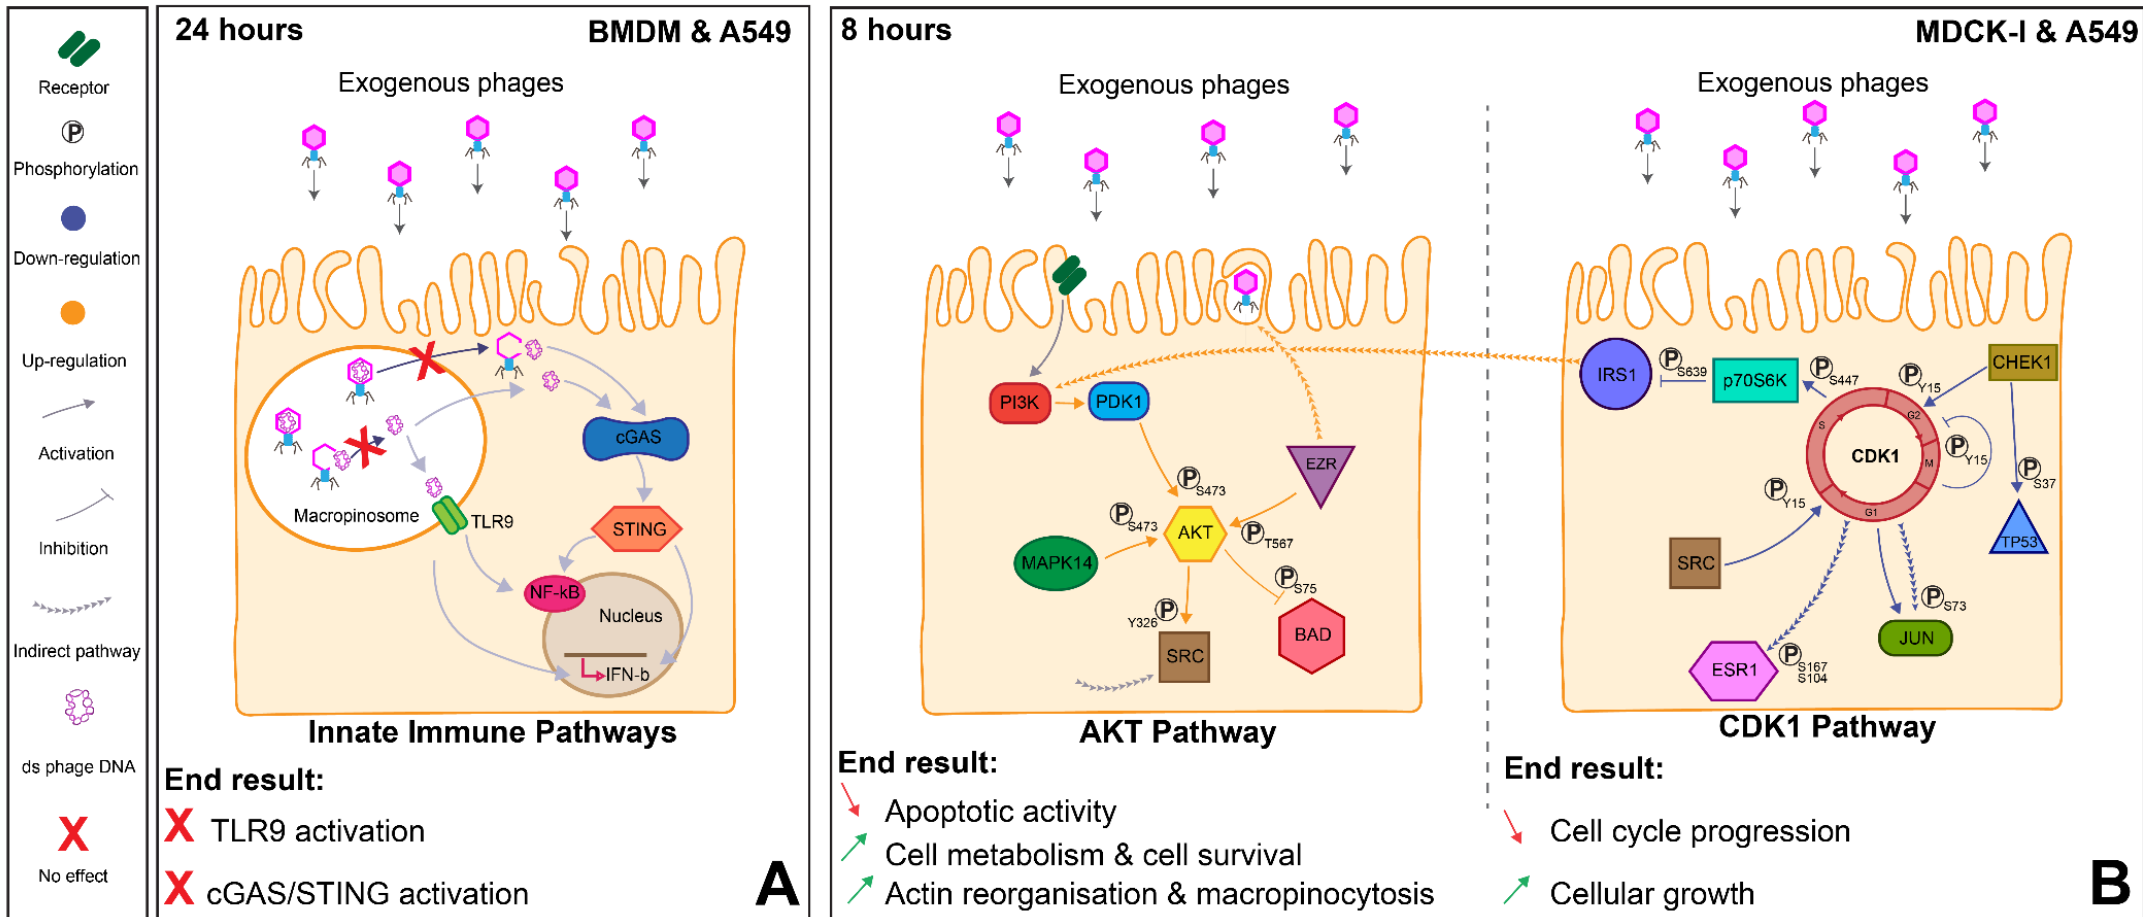

1 **Figure 6: Overview of the effect of exogenous phages on cellular pathways. (A)** Innate immune pathways in BMDM and A549 cells. Phage DNA  
 2 is protected by the phage capsid and is not detected by the TLR9 or cGAS-STING. **(B)** The effect of phages on MDCK-I and A549 cells after eight hours.  
 3 The AKT pathway on the left and the CDK1 pathway on the right show the major cellular changes detected in response to T4 phage.
